# Supplementary figures and images for: Transcriptional activation of histone H4 by C/EBPβ during the mitotic clonal expansion of 3T3-L1 adipocyte differentiation
Source: PubMed Central journal article supplement — Mol Biol Cell. 2011 Jul 1;22(13):2165–74. doi: 10.1091/mbc.E10-11-0912 (PMC3128520; doi:10.1091/mbc.e10-11-0912), 2011-07-01

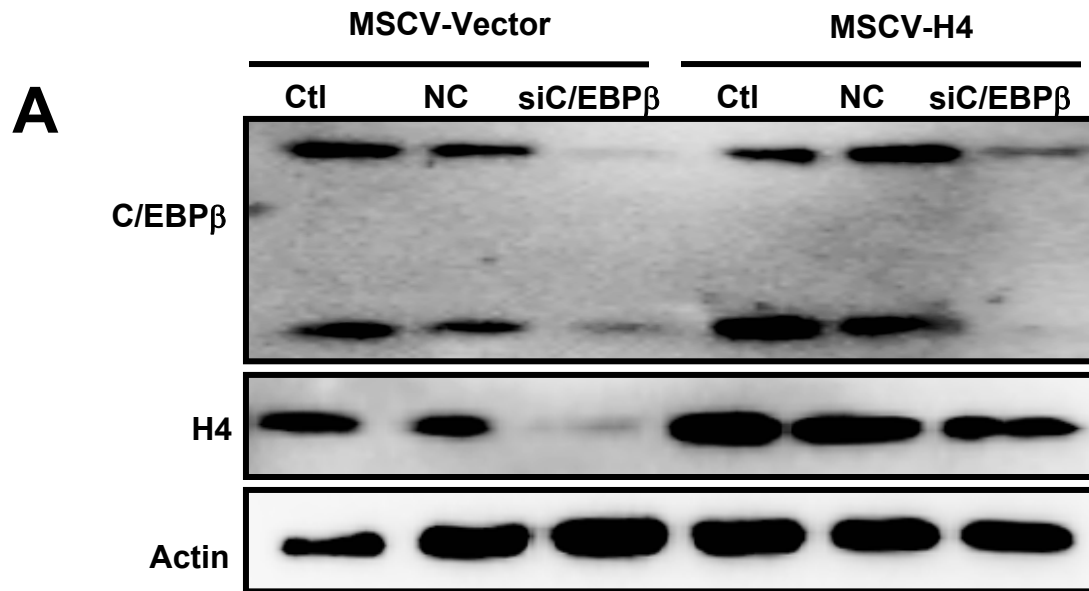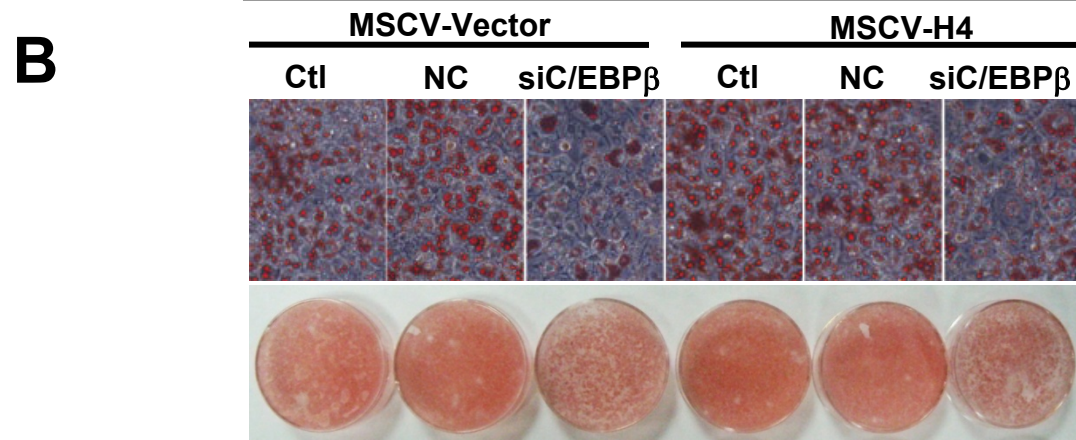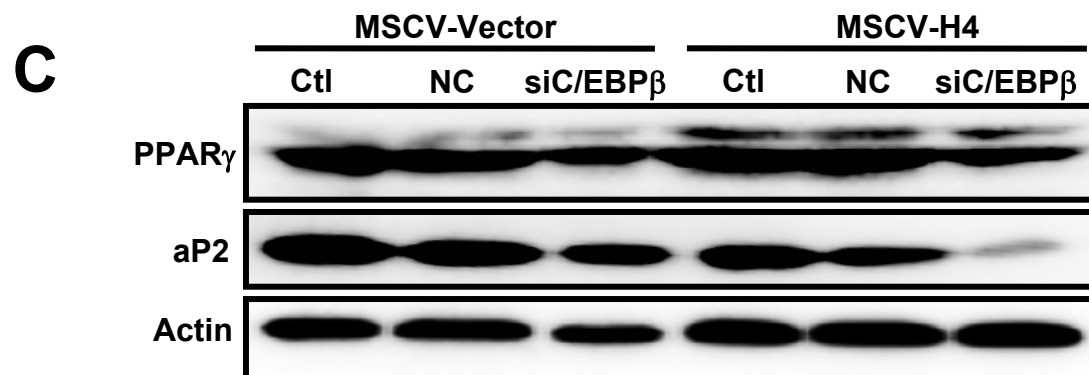

Supplement: E10-11-0912_1.pdf [file E10-11-0912_1.pdf]
